# Supplementary material for: A polysaccharide deacetylase enhances bacterial adhesion in high-ionic-strength environments
Source: PubMed Central journal article supplement (PMC8449245; doi:10.1016/j.isci.2021.103071), 2021-09-02
Supplement: mmc1.pdf [file mmc1.pdf]

**iScience, Volume 24**

**Supplemental information**

**A polysaccharide deacetylase enhances bacterial  
adhesion in high-ionic-strength environments**

**Nelson K. Chepkwony and Yves V. Brun**

## Supplemental information

**TABLE S1: Bacterial strains and plasmids, related to STAR Methods**

| Strain or Plasmid                                            | Description and or genotype                                                                                                                                                                                                          | Reference or source    |
|--------------------------------------------------------------|--------------------------------------------------------------------------------------------------------------------------------------------------------------------------------------------------------------------------------------|------------------------|
| <b><i>E. coli</i></b>                                        |                                                                                                                                                                                                                                      |                        |
| $\alpha$ select                                              | F <sup>-</sup> <i>deoR endA1 relA1 gyrA96 hsdR17(r<sub>K</sub>m<sub>K</sub><sup>+</sup>) supE44 thi-1 <math>\Delta</math>(lacZYA-argFV169) <math>\Phi</math>80<math>\Delta</math>lacZ<math>\Delta</math>M15 <math>\lambda</math></i> | Bioline                |
| BL21(DE3)                                                    | F <sup>-</sup> <i>ompT hsdSB (rB-mB-) gal dcm</i> ( $\lambda$ DE3)                                                                                                                                                                   | New England Biolabs    |
| YB8435                                                       | $\alpha$ select /pNPTS139 $\Delta$ <i>hfsH</i>                                                                                                                                                                                       | This study             |
| YB8432                                                       | $\alpha$ select /pNPTS139 $\Delta$ <i>hfaB</i>                                                                                                                                                                                       | (Chepkwony, 2019 #75)  |
| YB8428                                                       | $\alpha$ select/ pMR10::P <i>cu-hfsH<sub>HB</sub></i>                                                                                                                                                                                | This study             |
| YB9329                                                       | $\alpha$ select/ pMR10::P <i>cu-hfsH<sub>CC</sub></i>                                                                                                                                                                                | This study             |
| YB9328                                                       | BL21/ pET28a: <i>hfsH<sub>CC</sub></i> -His                                                                                                                                                                                          | This study             |
| YB9327                                                       | BL21/ pET28a: <i>hfsH<sub>HB</sub></i> -His                                                                                                                                                                                          | This study             |
| YB8444                                                       | $\alpha$ select/ pMR10::P <i>hfsE<sub>CC</sub></i> - <i>hfsH<sub>HB</sub></i>                                                                                                                                                        | This study             |
| YB8443                                                       | $\alpha$ select/ pMR10::P <i>hfsE<sub>HB</sub></i> - <i>hfsH<sub>CC</sub></i>                                                                                                                                                        | This study             |
| YB9535                                                       | $\alpha$ select/ pMR10::P <i>hfsE<sub>HB</sub></i> - <i>hfsH<sub>HB</sub></i>                                                                                                                                                        | This study             |
| YB217                                                        | $\alpha$ select/ pMR10::P <i>xyI<sub>CC</sub></i> - <i>hfsH<sub>CC</sub></i>                                                                                                                                                         | This study             |
| YB9536                                                       | $\alpha$ select/ pMR10::P <i>xyI<sub>CC</sub></i> - <i>hfsH<sub>HB</sub></i>                                                                                                                                                         | This study             |
| YB9537                                                       | $\alpha$ select/ pMR10::P <i>xyI<sub>HB</sub></i> - <i>hfsH<sub>CC</sub></i>                                                                                                                                                         | This study             |
| YB214                                                        | $\alpha$ select/ pMR10::P <i>xyI<sub>HB</sub></i> - <i>hfsH<sub>HB</sub></i>                                                                                                                                                         | This study             |
| <b><i>C. crescentus</i></b>                                  |                                                                                                                                                                                                                                      |                        |
| YB135                                                        | WT strain CB15                                                                                                                                                                                                                       | (Poindexter, 1964 #60) |
| YB9531                                                       | WT CB15 pMR10                                                                                                                                                                                                                        | This study             |
| YB2198                                                       | CB15 $\Delta$ <i>hfsH</i>                                                                                                                                                                                                            | (Toh, 2008 #68)        |
| YB8662                                                       | CB15 $\Delta$ <i>hfsK</i>                                                                                                                                                                                                            | (Sprecher, 2017 #65)   |
| YB4251                                                       | CB15 $\Delta$ <i>hfaB</i>                                                                                                                                                                                                            | (Hardy, 2010 #32)      |
| YB9532                                                       | CB15 $\Delta$ <i>hfaB</i> pMR10                                                                                                                                                                                                      | This study             |
| YB9540                                                       | CB15 $\Delta$ <i>hfsH</i> pMR10::P <i>hfsE<sub>CC</sub></i> - <i>hfsH<sub>CC</sub></i>                                                                                                                                               | (Toh, 2008 #68)        |
| YB9534                                                       | CB15 $\Delta$ <i>hfsH</i> pMR10::P <i>hfsE<sub>CC</sub></i> - <i>hfsH<sub>HB</sub></i>                                                                                                                                               | This study             |
| YB6887                                                       | CB15 $\Delta$ <i>hfsH</i> pMR10::P <i>xyI<sub>CC</sub></i> - <i>hfsH<sub>CC</sub></i>                                                                                                                                                | (Wan, 2013 #71)        |
| YB221                                                        | CB15 $\Delta$ <i>hfsH</i> pMR10::P <i>xyI<sub>CC</sub></i> - <i>hfsH<sub>HB</sub></i>                                                                                                                                                | This study             |
| YB9627                                                       | CB15 $\Delta$ <i>hfsH</i> pMR10::P <i>xyI<sub>CC</sub></i> - <i>hfsH<sub>HB</sub></i> <sup>D43A</sup>                                                                                                                                | This study             |
| YB9533                                                       | CB15 $\Delta$ <i>hfaB</i> $\Delta$ <i>hfsH</i>                                                                                                                                                                                       | This study             |
| YB9538                                                       | CB15 $\Delta$ <i>hfaB</i> $\Delta$ <i>hfsH</i> pMR10::P <i>xyI<sub>CC</sub></i> - <i>hfsH<sub>CC</sub></i>                                                                                                                           | This study             |
| YB223                                                        | CB15 $\Delta$ <i>hfaB</i> $\Delta$ <i>hfsH</i> pMR10::P <i>xyI<sub>CC</sub></i> - <i>hfsH<sub>HB</sub></i>                                                                                                                           | This study             |
| <b><i>H. baltica</i></b>                                     |                                                                                                                                                                                                                                      |                        |
| YB5842                                                       | WT strain                                                                                                                                                                                                                            | (Schlesner, 1990 #61)  |
| YB8438                                                       | WT pMR10                                                                                                                                                                                                                             | (Chepkwony, 2019 #75)  |
| YB8404                                                       | YB5842 $\Delta$ <i>hfsA</i>                                                                                                                                                                                                          | (Chepkwony, 2019 #75)  |
| YB8415                                                       | YB5842 $\Delta$ <i>hfsH</i>                                                                                                                                                                                                          | This study             |
| YB9326                                                       | YB5842 D43A <i>hfsH</i>                                                                                                                                                                                                              | This study             |
| YB8406                                                       | YB5842 $\Delta$ <i>hfaB</i>                                                                                                                                                                                                          | (Chepkwony, 2019 #75)  |
| YB8412                                                       | YB5842 $\Delta$ <i>hba1_1607</i>                                                                                                                                                                                                     | This study             |
| YB8419                                                       | YB5842 $\Delta$ <i>hba1_hfsK</i>                                                                                                                                                                                                     | This study             |
| YB9541                                                       | YB5842 $\Delta$ <i>hba1_1184</i>                                                                                                                                                                                                     | This study             |
| YB9542                                                       | YB5842 $\Delta$ <i>hfsK</i> $\Delta$ <i>hba1_1607</i>                                                                                                                                                                                | This study             |
| YB9543                                                       | YB5842 $\Delta$ <i>hfsK</i> $\Delta$ <i>hba1_1184</i>                                                                                                                                                                                | This study             |
| YB9544                                                       | YB5842 $\Delta$ <i>hfsK</i> $\Delta$ <i>hba1_1184</i> $\Delta$ <i>hba1_1607</i>                                                                                                                                                      | This study             |
| YB8417                                                       | YB5842 $\Delta$ <i>hfaB</i> pMR10                                                                                                                                                                                                    | (Chepkwony, 2019 #75)  |
| YB8416                                                       | YB5842 $\Delta$ <i>hfaB</i> $\Delta$ <i>hfsH</i>                                                                                                                                                                                     | This study             |
| YB9318                                                       | YB5842 $\Delta$ <i>hfsH</i> pMR10::P <i>cu-hfsH<sub>CC</sub></i>                                                                                                                                                                     | This study             |
| YB8422                                                       | YB5842 $\Delta$ <i>hfsH</i> pMR10::P <i>cu-hfsH<sub>HB</sub></i>                                                                                                                                                                     | This study             |
| YB8423                                                       | YB5842 $\Delta$ <i>hfsH</i> pMR10::P <i>hfsE<sub>HB</sub></i> - <i>hfsH<sub>CC</sub></i>                                                                                                                                             | This study             |
| YB8421                                                       | YB5842 $\Delta$ <i>hfsH</i> pMR10::P <i>hfsE<sub>HB</sub></i> - <i>hfsH<sub>HB</sub></i>                                                                                                                                             | This study             |
| YB8420                                                       | YB5842 $\Delta$ <i>hfsH</i> pMR10::P <i>xyI<sub>HB</sub></i> - <i>hfsH<sub>CC</sub></i>                                                                                                                                              | This study             |
| YB218                                                        | YB5842 $\Delta$ <i>hfsH</i> pMR10::P <i>xyI<sub>HB</sub></i> - <i>hfsH<sub>HB</sub></i>                                                                                                                                              | This study             |
| YB222                                                        | YB5842 $\Delta$ <i>hfaB</i> $\Delta$ <i>hfsH</i> pMR10::P <i>xyI<sub>HB</sub></i> - <i>hfsH<sub>CC</sub></i>                                                                                                                         | This study             |
| YB219                                                        | YB5842 $\Delta$ <i>hfaB</i> $\Delta$ <i>hfsH</i> pMR10::P <i>xyI<sub>HB</sub></i> - <i>hfsH<sub>HB</sub></i>                                                                                                                         | This study             |
| YB9539                                                       | YB5842 $\Delta$ <i>hfaB</i> $\Delta$ <i>hfsH</i> pMR10::P <i>cu-hfsH<sub>CC</sub></i>                                                                                                                                                | This study             |
| YB185                                                        | YB5842 $\Delta$ <i>hfaB</i> $\Delta$ <i>hfsH</i> pMR10::P <i>cu-hfsH<sub>HB</sub></i>                                                                                                                                                | This study             |
| YB9332                                                       | YB5842 $\Delta$ <i>hfsH</i> pMR10::P <i>cu-hfsH<sub>HB</sub></i> -X3FLAG                                                                                                                                                             | This study             |
| YB9331                                                       | YB5842 $\Delta$ <i>hfsH</i> pMR10::P <i>cu-hfsH<sub>CC</sub></i> -X3FLAG                                                                                                                                                             | This study             |
| <b>Plasmids</b>                                              |                                                                                                                                                                                                                                      |                        |
| pET28a(+)                                                    | Vector carrying an N- and C-terminal His-tag/ thrombin/T7-tag for protein overexpression                                                                                                                                             | Novagen                |
| pET28a <i>hfsH<sub>CC</sub></i>                              | Protein overexpression vector that carries the <i>hfsH<sub>CC</sub></i>                                                                                                                                                              | This study             |
| pET28a <i>hfsH<sub>HB</sub></i>                              | Protein overexpression vector that carries the <i>hfsH<sub>HB</sub></i>                                                                                                                                                              | This study             |
| pMR10                                                        | Mini-RK2 cloning vector; RK2 replication and stabilization functions                                                                                                                                                                 | R. Roberts and C. Mohr |
| pMR10::P <i>cu-hfsH<sub>HB</sub></i>                         | pMR10 containing <i>hfsH<sub>HB</sub></i> under copper inducible promoter                                                                                                                                                            | This study             |
| pMR10::P <i>cu-hfsH<sub>CC</sub></i>                         | pMR10 containing <i>hfsH<sub>CC</sub></i> under copper inducible promoter                                                                                                                                                            | This study             |
| pMR10::P <i>hfsE<sub>CC</sub></i> - <i>hfsH<sub>CC</sub></i> | Complementation vector that carries <i>hfsH<sub>CC</sub></i> under its native promoter                                                                                                                                               | This study             |
| pMR10::P <i>hfsE<sub>HB</sub></i> - <i>hfsH<sub>CC</sub></i> | Complementation vector that carries <i>hfsH<sub>CC</sub></i> under its <i>H. baltica</i> native promoter                                                                                                                             | This study             |
| pMR10::P <i>hfsE<sub>CC</sub></i> - <i>hfsH<sub>HB</sub></i> | Complementation vector that carries <i>hfsH<sub>HB</sub></i> under its <i>C. crescentus</i> native promoter                                                                                                                          | This study             |
| pMR10::P <i>hfsE<sub>HB</sub></i> - <i>hfsH<sub>HB</sub></i> | Complementation vector that carries <i>hfsH<sub>HB</sub></i> under its native promoter                                                                                                                                               | This study             |
| pMR10::P <i>cu-hfsH<sub>HB</sub></i> -X3FLAG                 | Triple FLAG tagged <i>hfsH<sub>HB</sub></i>                                                                                                                                                                                          | This study             |
| pMR10::P <i>cu-hfsH<sub>CC</sub></i> -X3FLAG                 | Triple FLAG tagged <i>hfsH<sub>CC</sub></i>                                                                                                                                                                                          | This study             |
| pNPTS139                                                     | pLitmus 39 derivative, $\alpha$ rrT, <i>sacB</i> , Kan <sup>r</sup>                                                                                                                                                                  | M.R..K Alley           |
| pNPTS139 $\Delta$ <i>hfsH</i>                                | pNPTS139 containing 500 bp fragments upstream and downstream of <i>hfsH</i>                                                                                                                                                          | This study             |
| pNPTS139 $\Delta$ <i>hfaB</i>                                | pNPTS139 containing 500 bp fragments upstream and downstream of <i>hfaB</i>                                                                                                                                                          | (Chepkwony, 2019 #75)  |



## SUPPORTING FIGURES AND FIGURE LEGENDS

Figure S1. The HfsK acetyltransferase is not required for holdfast adhesion and biofilm formation in *H. baltica*, related to Figure 2

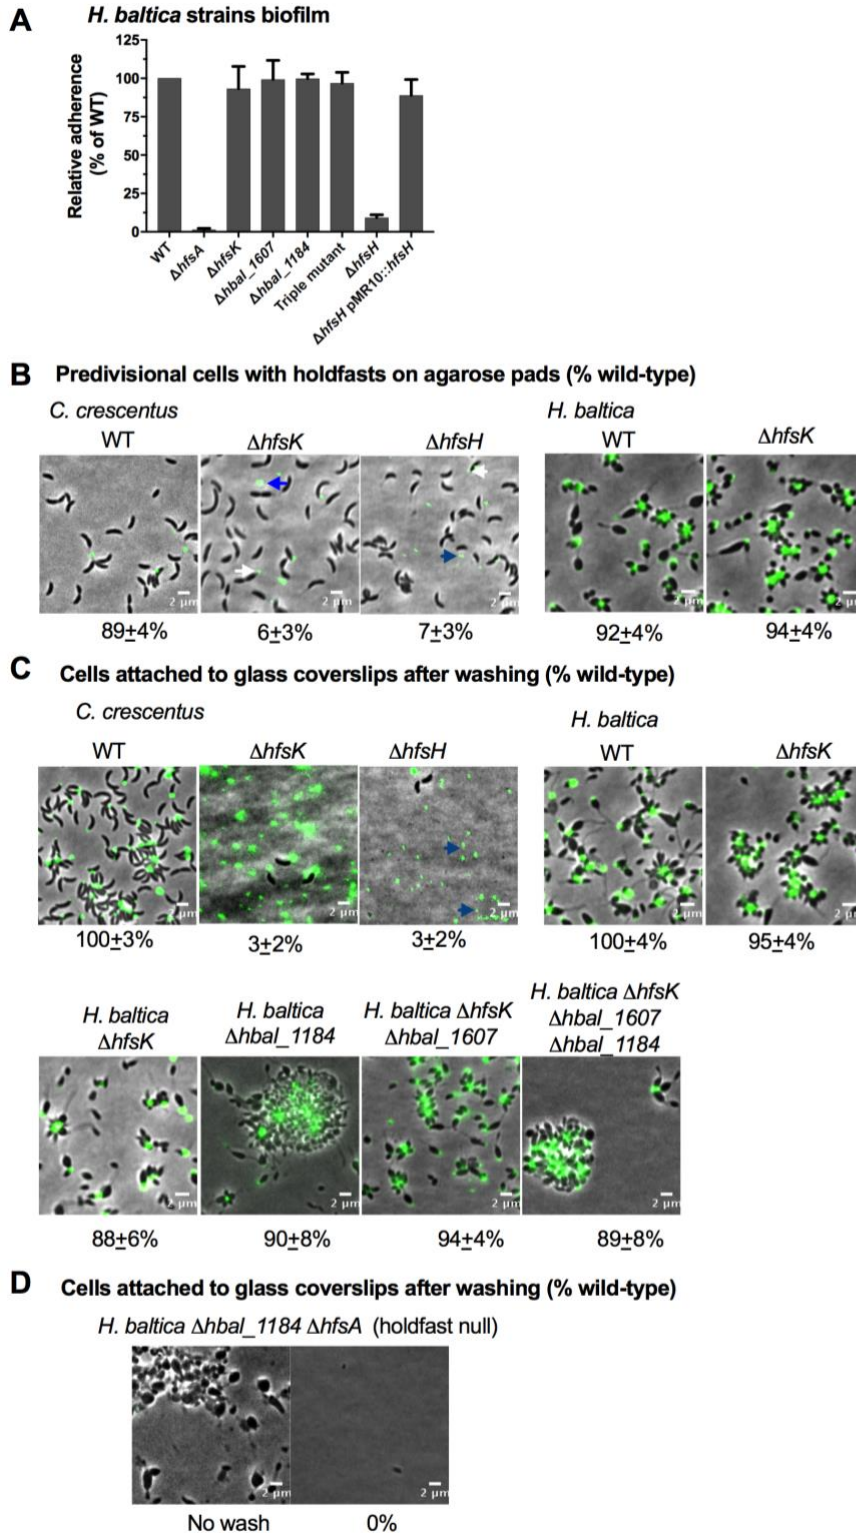

**Figure S1. The HfsK acetyltransferase is not required for holdfast adhesion and biofilm formation in *H. baltica*, related to Figure 2**

**A.** Quantification of biofilm formation by the crystal violet assay after incubation for 12 h, expressed as a mean percent of WT crystal violet staining. Holdfast null strain  $\Delta hfsA$  was used as a negative control. Error is expressed as the standard error of the mean of three independent biological replicates with four technical replicates each. The triple mutant is *H. baltica*  $\Delta hfsK \Delta hbaI_{1607} \Delta hbaI_{1184}$ . **B.** Representative images showing merged phase and fluorescence channels of the indicated *C. crescentus* and *H. baltica* strains on agarose pads. Holdfast is labeled with AF488-WGA (green). White arrows indicate holdfasts attached to the  $\Delta hfsH$  and  $\Delta hfsK$  cells, and blue arrows indicate holdfast shed into the medium. Exponential planktonic cultures were used to quantify the percentage of predivisional cells with holdfast. Data are expressed as the mean of three independent biological replicates with four technical replicates each. Error bars represent the standard error of the mean. A total of 3,000 cells were quantified per replicate using MicrobeJ (Images for the WT and *hfsH* are from Fig. 2). **C-D.** Representative images showing merged phase and fluorescence channels of *C. crescentus* and *H. baltica* strains bound to a glass coverslip. Exponential cultures were incubated on the glass slides for 1 h, washed to remove unbound cells, and holdfast were labelled with AF488-WGA (green). Blue arrows indicate surface-bound holdfasts shed by *hfsH* mutants. The data showing quantification of cells bound to the glass coverslip are the mean of two biological replicates with five technical replicates each. Error is expressed as the standard error of the mean using MicrobeJ (Images for the WT and *hfsH* are from Fig. 2).

**Figure S2. *H. baltica* and *C. crescentus* holdfast modification enzymes HfsK and HfsH, related to Figure 2.**

**A Complementation of HfsH mutants on agarose pads (% predivisional cells with holdfast)**

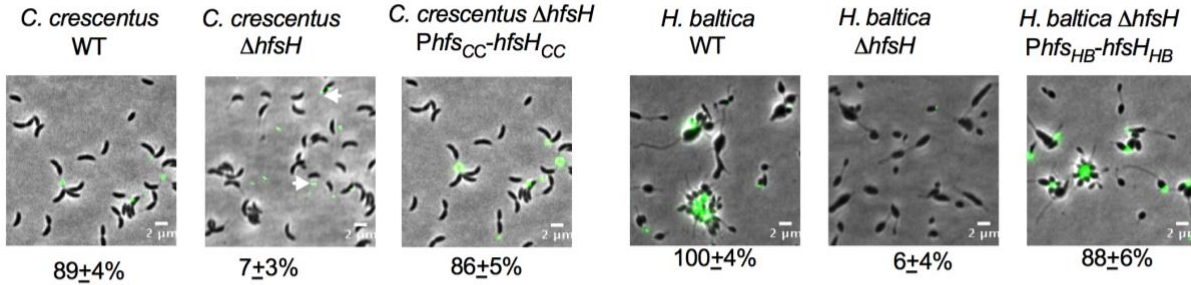

**B *C. crescentus* holdfast WGA fluorescent area**

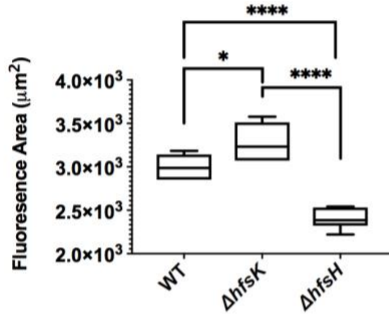

**D *H. baltica* HfsH expression**

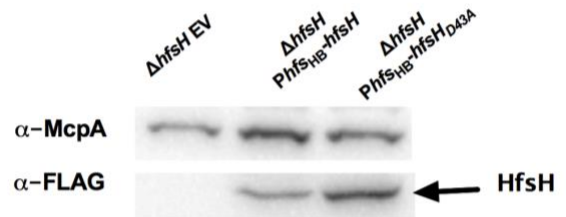

**C HfsH sequence alignment**

|                          |     |                                                                                  |     |                      |
|--------------------------|-----|----------------------------------------------------------------------------------|-----|----------------------|
|                          |     | Acetate binding residues                                                         |     |                      |
| <i>hfsH<sub>CC</sub></i> | 1   | MmeFEKV-DA-YEPDRSLKGLRRRLIRLAHRRPAKV-ALERPVSFSDAPATAACEAGARALEARGLRGTYFAAGL      | 77  |                      |
| <i>hfsH<sub>HB</sub></i> | 1   | M-----IdWH-YTPSRTLPAKLRKRMQWRHAAPVDV-SNTPQPHVSYFDLPPMSAVNGA-DILESHDGHAAFYACTKM   | 71  |                      |
|                          |     | Zinc binding residues                                                            |     | Catalytic residues   |
| <i>hfsH<sub>CC</sub></i> | 78  | TGRDGPGRYATGEDARRIHEAGHEIACHTYSELDGCOSSOTETLADVDRNAE-SLAANGAGD-PVSFAFPYGDVAAPAK  | 155 |                      |
| <i>hfsH<sub>HB</sub></i> | 72  | LTGHAYGDMDYIKTMLDENRGHEIGAHTSHLDCAQSKRETVLNDIDANIS-ALMEAGLKK-PTSFAFPYGETLFDTK    | 150 |                      |
|                          |     | Catalytic residues                                                               |     | Zinc binding residue |
| <i>hfsH<sub>CC</sub></i> | 156 | TALSGRFKTLRALHHGLITDQADLNQTPAVGIEGEGD--ETVAKAWLDKA-KARKAWLILYTHDVAQPSQWGCTTEALER | 233 |                      |
| <i>hfsH<sub>HB</sub></i> | 151 | KEVFKKFDLCRGILPGINVGRVDLAQLRCFELNENFA-TRIRAINAIEEAGKTGWVIFTHDVSQPTAYGTTGIVEE     | 229 |                      |
| <i>hfsH<sub>CC</sub></i> | 234 | LIDRALADGFDVVTVAEGSRRIGL--                                                       | 257 |                      |
| <i>hfsH<sub>HB</sub></i> | 230 | LCQLSKAAGATLSTPTEAARSYGLIS                                                       | 255 |                      |

**E *C. crescentus***

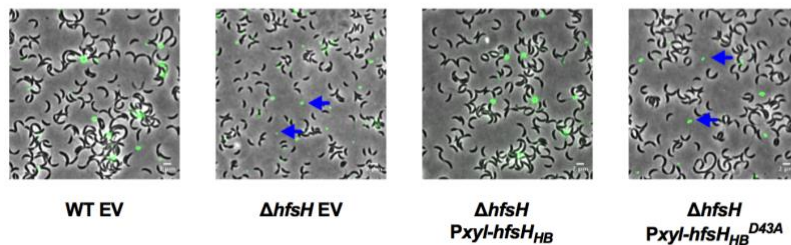

**Figure S2. *H. baltica* and *C. crescentus* modification enzymes HfsK and HfsH, related to Figure 2.**

**A.** Images showing merged phase and fluorescence channels of the indicated strains of *C. crescentus* (left) and *H. baltica* (right). Holdfast is labeled with AF488-WGA (green).

Exponential planktonic cultures were used to quantify the percentage of predivisional cells with holdfast. Data is expressed as the mean of three independent biological replicates with four technical replicates each. Error bars represent the standard error of the mean. **B.** Box plot

showing the area of AF488-WGA fluorescence from holdfast produced by *C. crescentus* strains. Data is the mean of four biological replicates. The horizontal bar represents the median, the box represents 25<sup>th</sup> and 75<sup>th</sup> percentile, and the whiskers represent the full range of data. \* and \*\*\*

represent *P* values <0.1 and <0.0001 **C.** Alignment of the *C. crescentus* and *H. baltica* HfsH amino acid sequences with conserved carbohydrate esterase family 4 (CE4) motifs indicated by rectangles. The conserved residue involved in acetate binding is indicated with an asterisk (D48 in *C. crescentus* HfsH and D43 in *H. baltica* HfsH). **D.** Western blots of whole cell lysates of the

indicated strains showing the expression level of FLAG-tag fusions of HfsH and HfsH<sup>D43A</sup>. McpA levels were monitored as a loading control. **E.** Images showing merged phase and fluorescence channels of the indicated strains of *C. crescentus* and *C. crescentus*  $\Delta$ *hfsH* cross-complemented with *hfsH* from *H. baltica*: *hfsH*<sub>HB</sub> (WT) and *hfsH*<sub>HB</sub><sup>D43A</sup> (active site mutant). Holdfast is labeled with AF488-WGA (green) and blue arrows indicate shed holdfasts.

Figure S3. HfsH expression using a copper inducible promoter ( $P_{Cu}$ ) in *H. baltica*, related to Figure 4

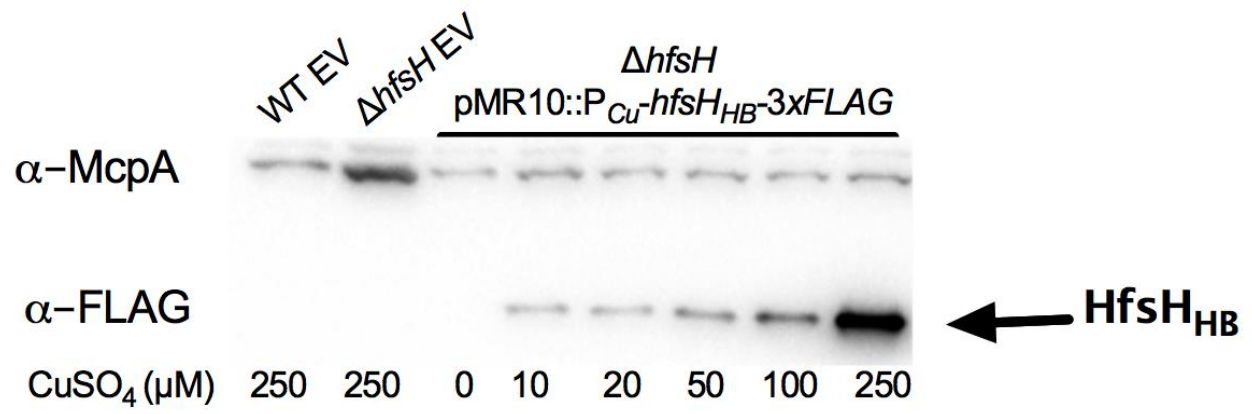



**Figure S3. HfsH expression using a copper inducible promoter ( $P_{Cu}$ ) in *H. baltica*, related to Figure 4**

Western blots of whole cell lysates showing the expression levels of FLAG-tagged HfsH under the control of the copper inducible promoter after 4 h of induction with 0 – 250  $\mu$ M  $CuSO_4$ . McpA levels were monitored as a loading control.

Figure S4. Levels of HfsH<sub>HB</sub> and HfsH<sub>CC</sub> expression using *Phfs* and *Pxyl* promoters in *H. baltica*, related to Figure 5

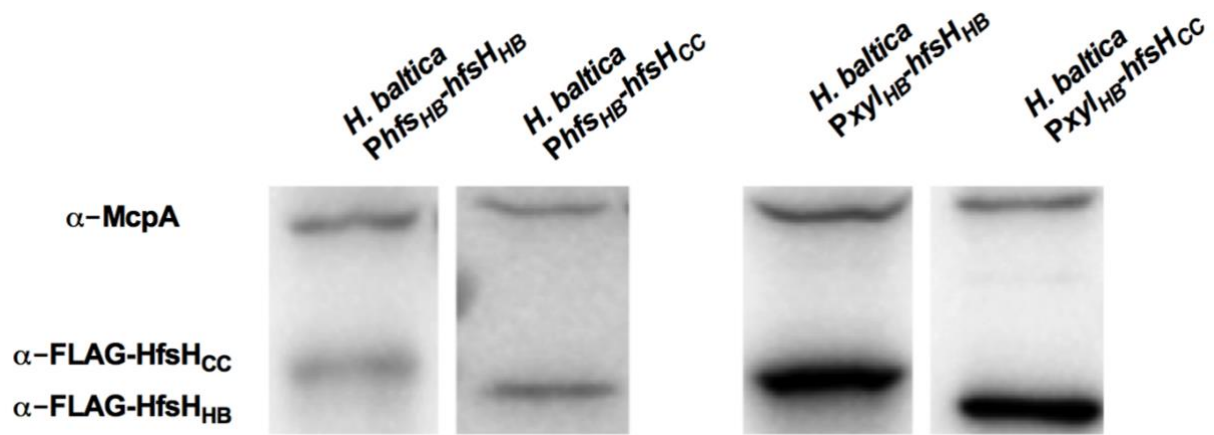

**Figure S4. Levels of HfsH<sub>HB</sub> and HfsH<sub>CC</sub> expression using *P<sub>hfs</sub>* and *P<sub>xyI</sub>* promoters in *H. baltica*, related to Figure 5**

Western blots of whole cell lysates showing the expression levels of FLAG-tagged HfsH<sub>HB</sub> and HfsH<sub>CC</sub> under the control of native holdfast synthesis (*P<sub>hfs</sub>*) and xylose-inducible (*P<sub>xyI</sub>*) promoters after 4 h of induction with 0.03% xylose. McpA levels were monitored as a loading control.

**Figure S5. Cross-complementation of HfsH<sub>HB</sub> and HfsH<sub>CC</sub> using the copper inducible promoter, related to Figure 5**

**A** WGA fluorescent intensity of holdfast decetylated by HfsH<sub>HB</sub> and HfsH<sub>CC</sub> in *H. baltica* with 50  $\mu$ M CuSO<sub>4</sub>

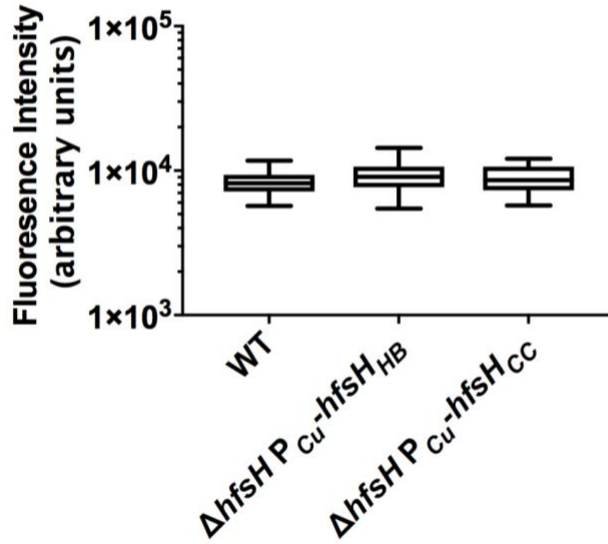

**B** HfsH<sub>CC</sub> and HfsH<sub>HB</sub> expression using a copper inducible promoter

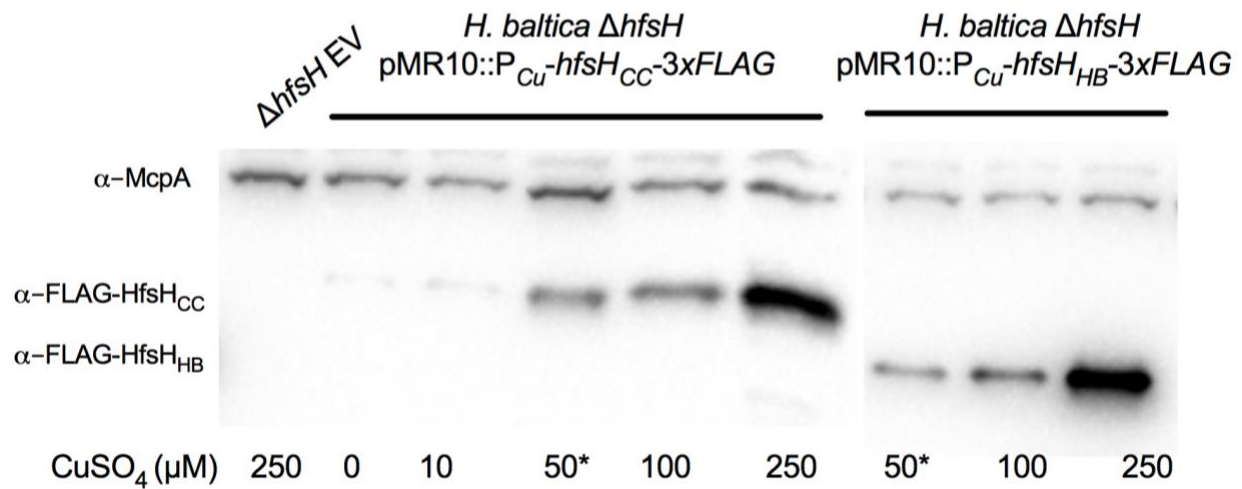

**Figure S5. Cross-complementation of HfsH<sub>HB</sub> and HfsH<sub>CC</sub> using the copper inducible promoter, related to Figure 5**

**A.** Box plot showing the integrated intensity of AF488-WGA fluorescence from holdfast produced by *H. baltica*  $\Delta hfsH$  pMR10::P<sub>Cu</sub>-hfsH<sub>HB</sub> and cross-complemented *H. baltica*  $\Delta hfsH$  pMR10::P<sub>Cu</sub>-hfsH<sub>CC</sub> at 50  $\mu$ M CuSO<sub>4</sub> induction for 4 h. Data is the mean of four biological replicates. The horizontal bar represents the median, the box represents 25<sup>th</sup> and 75<sup>th</sup> percentile, and the whiskers represent the full range of data. **B.** Western blots of whole cell lysates showing the expression level of FLAG-tagged HfsH<sub>HB</sub> and HfsH<sub>CC</sub> under the control of the copper inducible promoter after 4 h of induction with 0 – 250  $\mu$ M CuSO<sub>4</sub>. McpA levels were monitored as a loading control. The star indicates HfsH induction at 50  $\mu$ M CuSO<sub>4</sub>, used in comparing *H. baltica* and *C. crescentus* holdfast binding.
